# Supplementary material
Source: HighWire-hosted journal article supplement (https://erj.ersjournals.com/content/59/4/2101935)
Supplement: inline-supplementary-material-1 [file inline-supplementary-material-1.pdf]

## Online supplementary material

### Cancer risk in patients with sleep apnoea following adherent 5-year CPAP therapy.

Grégoire Justeau<sup>1,2</sup>, Sebastien Bailly<sup>3</sup>, Chloé Gervès-Pinquier<sup>4</sup>, Wojciech Trzepizur<sup>1,2</sup>, Nicole Meslier<sup>1,2</sup>, François Goupil<sup>5</sup>, Thierry Pigeanne<sup>6</sup>, Sandrine Launois<sup>7</sup>, Laurene Leclair-Visonneau<sup>8</sup>, Philippe Masson<sup>9</sup>, Acya Bizieux-Thaminy<sup>10</sup>, Jean-Louis Racineux<sup>4</sup>, David Gozal<sup>4</sup>, Frédéric Gagnadoux<sup>1,2</sup>, on behalf of the *ERMES study group*.

<sup>1</sup> Department of Respiratory and Sleep Medicine, Angers University hospital, Angers, France

<sup>2</sup> INSERM Unit 1063, Angers, France

<sup>3</sup> University Grenoble Alpes, Inserm, CHU Grenoble Alpes, HP2, Grenoble, France

<sup>4</sup> Pays de la Loire Respiratory Health Research Institute, Beaucouzé, France

<sup>5</sup> Department of Respiratory Diseases, Le Mans General Hospital, Le Mans, France

<sup>6</sup> Respiratory Unit, Pôle santé des Olonnes, Olonne sur Mer, France

<sup>7</sup> CEREVES Paris Jean-Jaurès, hôpital Jean-Jaurès, 75019 Paris, France

<sup>8</sup> Department of Physiology and Sleep Medicine, Nantes University Hospital, Nantes, France

<sup>9</sup> Department of Respiratory Diseases, Cholet General Hospital, Cholet, France

<sup>10</sup> Department of Respiratory Diseases, La Roche sur Yon General Hospital, La Roche sur Yon, France

<sup>11</sup> Department of Child Health, The University of Missouri School of Medicine, Columbia, MO 65201, USA

**Corresponding author:** Frédéric Gagnadoux, Département de Pneumologie, CHU, 4 rue Larrey, 49033 Angers Cedex, France; Phone: 33 241353695; Fax: 33 241354974

e-mail : [frgagnadoux@chu-angers.fr](mailto:frgagnadoux@chu-angers.fr)

**Table S1:** definition of covariates

| <b>Variables</b>                             | <b>Definition</b>                                                                                                                                                                                                                                                                                                                                                                                                                |
|----------------------------------------------|----------------------------------------------------------------------------------------------------------------------------------------------------------------------------------------------------------------------------------------------------------------------------------------------------------------------------------------------------------------------------------------------------------------------------------|
| Obesity                                      | According to the WHO definition, obesity was defined by a body mass index of at least 30 kg/m <sup>2</sup>                                                                                                                                                                                                                                                                                                                       |
| Hypertension (HTN)                           | Blood pressure measurements taken in the sleep clinic were not used to diagnose HTN, as clinical blood pressure measured on only one occasion cannot be used as a reliable indicator for the definition of HTN. Only patients who were previously diagnosed as hypertensive based on data reported during baseline standardized health interview, and were taking antihypertensive medication were considered as having HTN [1]. |
| Diabetes mellitus                            | Patients who were previously diagnosed with diabetes according to data from baseline standardized health interview, and use of oral hypoglycemic medications and/or insulin were considered as having diabetes mellitus [2].                                                                                                                                                                                                     |
| Chronic obstructive pulmonary disease (COPD) | A COPD label was assigned for participants who were previously diagnosed with COPD, chronic bronchitis or emphysema, according to data from baseline standardized health interview [3] .                                                                                                                                                                                                                                         |
| Cardiovascular diseases                      | Based on data reported by participants during the baseline standardized health interview, cardiovascular diseases were defined as history of physician-diagnosed angina, myocardial infarction, coronary revascularization procedure, heart failure, atrial fibrillation and/or stroke [4].                                                                                                                                      |
| Smoking status                               | Never smokers were defined as people who had never smoked in their lifetime; former smokers were defined as people who had previously smoked but had stopped smoking for at least one year at the time of their diagnostic sleep study; a current smoker label was assigned if a patient was a smoker within the past year.                                                                                                      |
| Excessive daytime sleepiness                 | Excessive daytime sleepiness was assessed using the Epworth Sleepiness Score [5, 6].                                                                                                                                                                                                                                                                                                                                             |
| Depression                                   | Patients who were previously diagnosed with depression according to data from baseline standardized health interview, and use of antidepressant medications were considered as depression [7].                                                                                                                                                                                                                                   |

**Table S2:** Comparison of imputed and non-imputed dataset

|                        | Non imputed |      |      |      |       | Imputed |      |      |      |       |
|------------------------|-------------|------|------|------|-------|---------|------|------|------|-------|
|                        | N           | Mean | Std  | Min  | Max   | N       | Mean | Std  | Min  | Max   |
| Body mass index        | 4479        | 32,1 | 6,7  | 15,3 | 69,3  | 89980   | 32,1 | 6,7  | 15,3 | 69,3  |
| Epworth score          | 4373        | 10,5 | 5,0  | 0,0  | 24,0  | 89980   | 10,5 | 5,0  | 0,0  | 24,0  |
| Apnea Hypopnea Index   | 4489        | 41,2 | 20,8 | 5,5  | 159,0 | 89980   | 41,1 | 20,8 | 5,5  | 159,0 |
| Prevalent hypertension | 4029        | 0,4  | 0,5  | 0,0  | 1,0   | 89980   | 0,4  | 0,5  | 0,0  | 1,0   |
| Prevalent CV disease   | 4338        | 0,2  | 0,4  | 0,0  | 1,0   | 89980   | 0,2  | 0,4  | 0,0  | 1,0   |
| Prevalent Diabetes     | 4056        | 0,2  | 0,4  | 0,0  | 1,0   | 89980   | 0,2  | 0,4  | 0,0  | 1,0   |

Abbreviations : N, number; Std, standard deviation; Min, minimum ; Max, Maximum ; CV, cardiovascular

**Table S3:** Logistic regression model to assess the probability of being CPAP adherent

| Variable                          | Odds Ratio [95%CI] | p value |
|-----------------------------------|--------------------|---------|
| Age                               | 1.01 [1 ; 1.01]    | 0.0038  |
| Sex (male)                        | 1.16 [1.02 ; 1.33] | 0.0260  |
| Epworth score $\geq 10$           | 1.03 [0.91 ; 1.17] | 0.6208  |
| BMI categories, kg/m <sup>2</sup> |                    | 0.0007  |
| <25                               | 0.76 [0.65 ; 0.89] |         |
| 25-30                             | 1.07 [0.91 ; 1.26] | 0.4253  |
| >30                               | 1 [.;.]            | .       |
| Prevalent hypertension            | 1.14 [0.99 ; 1.32] | 0.0732  |
| Prevalent CV diseases             | 0.83 [0.7 ; 0.98]  | 0.0250  |
| Prevalent Diabetes                | 0.81 [0.68 ; 0.96] | 0.0181  |

**Table S4:** Primary outcome final model

| Variable                                       | OR [95%CI]         | Pvalue |
|------------------------------------------------|--------------------|--------|
| CPAP adherence                                 | 0.94 [0.78 ; 1.14] | 0.5227 |
| Epworth score $\geq 10$                        | 0.79 [0.65 ; 0.95] | 0.0139 |
| Age                                            | 1.04 [1.03 ; 1.05] | <.0001 |
| Sex (male)                                     | 1.11 [0.9 ; 1.38]  | 0.3275 |
| Body mass index (ref $>30$ kg/m <sup>2</sup> ) |                    |        |
| <25                                            | 0.91 [0.71 ; 1.17] | 0.4678 |
| 25-30                                          | 1.08 [0.84 ; 1.38] | 0.5630 |
| Prevalent hypertension                         | 0.81 [0.65 ; 1]    | 0.0520 |
| Prevalent diabetes                             | 1.23 [0.97 ; 1.58] | 0.0920 |

## References

1. Priou P, Le Vaillant M, Meslier N, Paris A, Pigeanne T, Nguyen X-L, Alizon C, Bizieux-Thaminy A, Leclair-Visonneau L, Humeau M-P, Gagnadoux F, IRSR sleep cohort group. Cumulative association of obstructive sleep apnea severity and short sleep duration with the risk for hypertension. *PLoS One* 2014; 9: e115666.
2. Resnick HE, Redline S, Shahar E, Gilpin A, Newman A, Walter R, Ewy GA, Howard BV, Punjabi NM, Sleep Heart Health Study. Diabetes and sleep disturbances: findings from the Sleep Heart Health Study. *Diabetes Care* 2003; 26: 702–709.
3. Halbert RJ, Natoli JL, Gano A, Badamgarav E, Buist AS, Mannino DM. Global burden of COPD: systematic review and meta-analysis. *Eur. Respir. J.* 2006; 28: 523–532.
4. Punjabi NM, Caffo BS, Goodwin JL, Gottlieb DJ, Newman AB, O'Connor GT, Rapoport DM, Redline S, Resnick HE, Robbins JA, Shahar E, Unruh ML, Samet JM. Sleep-disordered breathing and mortality: a prospective cohort study. *PLoS Med.* 2009; 6: e1000132.
5. Gagnadoux F, Le Vaillant M, Goupil F, Pigeanne T, Chollet S, Masson P, Humeau M-P, Bizieux-Thaminy A, Meslier N, IRSR sleep cohort group. Influence of marital status and employment status on long-term adherence with continuous positive airway pressure in sleep apnea patients. *PLoS One* 2011; 6: e22503.
6. Johns MW. A new method for measuring daytime sleepiness: the Epworth sleepiness scale. *Sleep* 1991; 14: 540–545.
7. Gagnadoux F, Le Vaillant M, Goupil F, Pigeanne T, Chollet S, Masson P, Bizieux-Thaminy A, Humeau M-P, Meslier N, IRSR Sleep Cohort Group\*. Depressive symptoms before and after long-term CPAP therapy in patients with sleep apnea. *Chest* 2014; 145: 1025–1031.
